# Supplementary material
Source: publisher figshare collection journal article supplement (https://microbiology.figshare.com/ndownloader/files/20065586)
Supplement: Supplementary file 1 [file 20065586]

## Sheet: Table S5
Sample	Bowtie2	Kraken2 (minikraken2_v2 DB)
	DENV (%)	Unclassified (%)	Homo sapiens (%)	DENV (%)
SRR5821236	24.72	5.47	71.61	19.63
SRR5821224	26.43	7.01	71.06	19.58
SRR5821192	36.88	8.12	61.78	28.73
SRR5821239	41.15	8.29	56.43	33.84
SRR5821167	49.19	14.79	50.16	34.38
SRR5821166	62.03	13.72	37.77	47.97
